# Supplementary material
Source: Springer Nature journal article supplement (https://www.springermedizin.de/resource/supplementary/13063_2010_678_MOESM2_ESM.pdf/9618458)

## Meeting Cycle 1: Maternal and Newborn Health

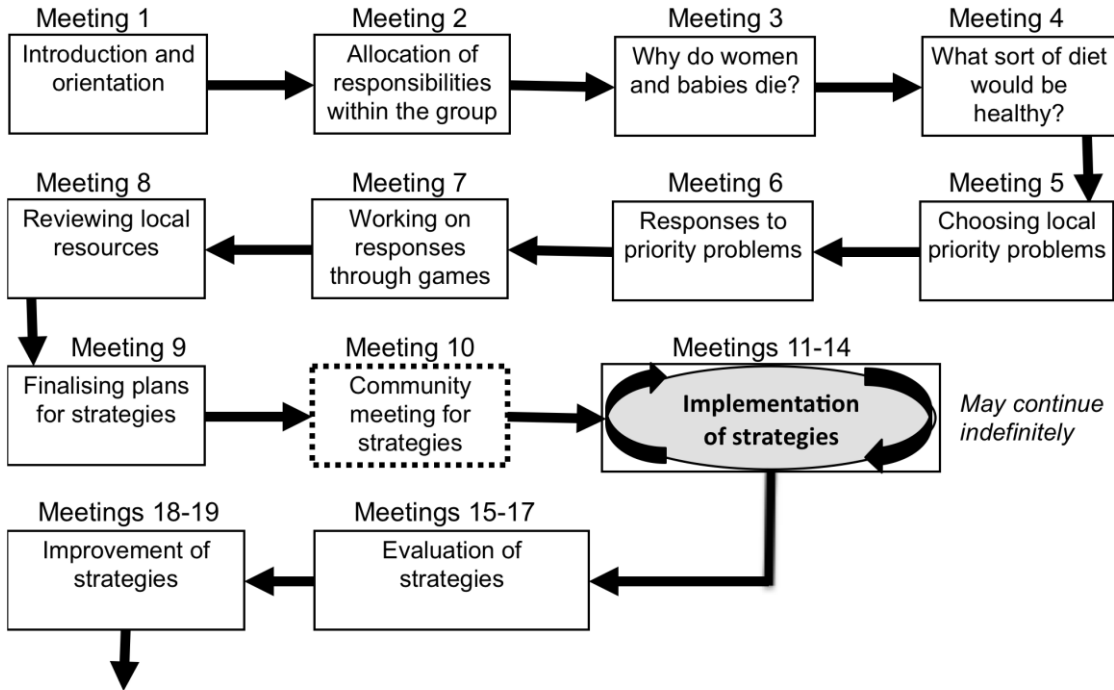

## Meeting Cycle 2: Nutrition in pregnancy, postpartum and infancy

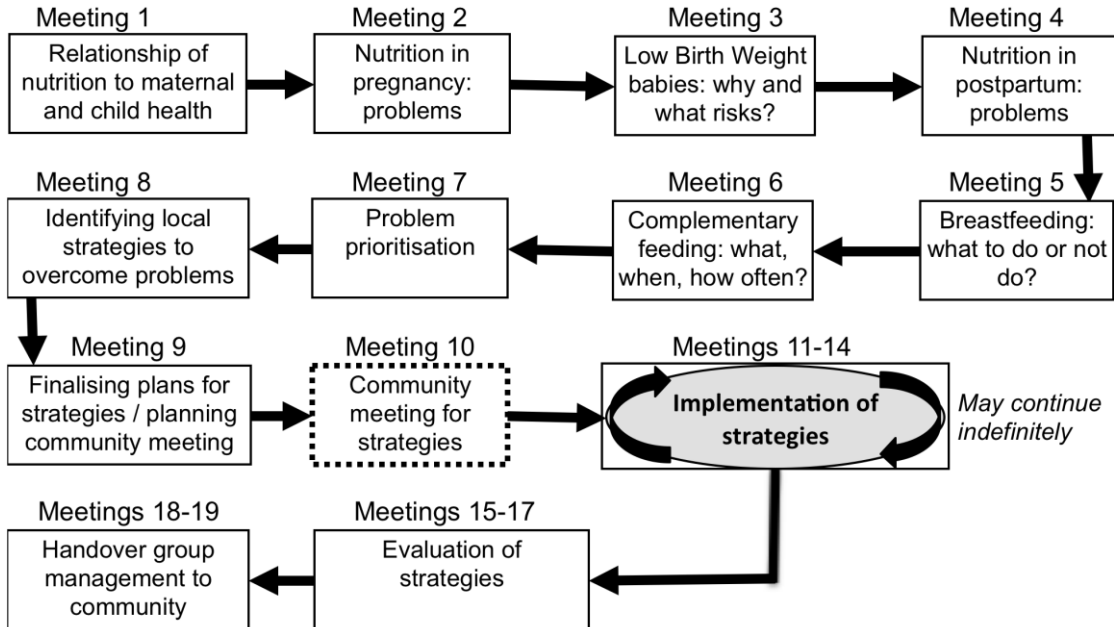

Supplement: MOESM2 [file 9618458]
